# Supplementary material for: Thermo- and photo-stable symmetrical benzo[cd]indolenyl-substituted heptamethine cyanine dye carrying a tetrakis(pentafluorophenyl)borate that absorbs only near-infrared light over 1000 nm
Source: Royal Society of Chemistry journal article supplement (doi:10.1039/c9nj00867e), 2019-01-01

## Supporting Information

### Thermo- and Photostable Symmetrical Benzo[*cd*]indolenyl-Substituted Heptamethine Cyanine Dyes Carrying a Tetrakis(pentafluorophenyl)borate that Absorb Only Near-Infrared Light over 1000 nm

Kazumasa Funabiki,<sup>1\*</sup> Ryuta Yanagawa,<sup>1</sup> Yasuhiro Kubota,<sup>1</sup> and Toshiyasu Inuzuka<sup>2</sup>

<sup>1</sup> Department of Chemistry and Biomolecular Science, Gifu University, 1-1 Yanagido, Gifu 501-1193, Japan

<sup>2</sup> Division of Instrumental Analysis, Life Science Research Center, Gifu University, 1-1 Yanagido, Gifu 501-1193, Japan.

#### (Contents)

|                                                                                  |          |
|----------------------------------------------------------------------------------|----------|
| Photographs of TLC plates.....                                                   | p. 2     |
| <sup>1</sup> H and <sup>13</sup> C NMR for <b>2</b> .....                        | p. 3     |
| <sup>1</sup> H and <sup>13</sup> C NMR for <b>3</b> .....                        | p. 4     |
| <sup>1</sup> H and <sup>13</sup> C NMR for <b>5a</b> .....                       | p. 5     |
| <sup>1</sup> H, <sup>13</sup> C NMR, and <sup>19</sup> F NMR for <b>5b</b> ..... | p. 6-7   |
| <sup>1</sup> H, <sup>13</sup> C NMR, and <sup>19</sup> F NMR for <b>6</b> .....  | p. 8-9   |
| <sup>1</sup> H, <sup>13</sup> C NMR, and <sup>19</sup> F NMR for <b>5c</b> ..... | p.10-11  |
| <sup>1</sup> H, <sup>13</sup> C NMR, and <sup>19</sup> F NMR for <b>5d</b> ..... | p. 12-13 |

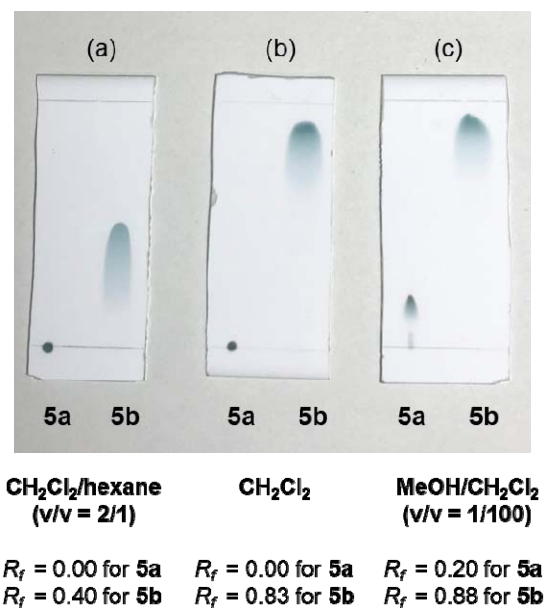

**Figure S1.** TLC plates of the prepared symmetrical benzo[*cd*]indolenyl-substituted heptamethine cyanine dyes **5a**,**b** using  $\text{CH}_2\text{Cl}_2/\text{hexane}$  (a),  $\text{CH}_2\text{Cl}_2$  (b), and  $\text{MeOH}/\text{CH}_2\text{Cl}_2$  (c).

The obtained symmetrical benzo[*cd*]indolenyl-substituted heptamethine cyanine dye **5a** carrying the  $\text{ClO}_4^-$  anion is highly polar. As a result, the  $R_f$  value of **5a** carrying the  $\text{ClO}_4^-$  anion is 0.20, using much polar solvents, such as methanol/ $\text{CH}_2\text{Cl}_2$  (v/v = 1/100) as an eluent on a TLC plate, as shown in Figure S3(c). Interestingly, the  $R_f$  value (0.88) of the corresponding heptamethine cyanine dye **5b** carrying the  $(\text{C}_6\text{F}_5)_4\text{B}^-$  anion is much greater than that of the dye **5a**, using the same mixed solvents, as shown in Figure 3(c). As shown in Figures 3(a),(b), even the use of less polar solvents, such as  $\text{CH}_2\text{Cl}_2/\text{hexane}$  (v/v = 2/1) or  $\text{CH}_2\text{Cl}_2$ , as eluents on TLC plates resulted in moderate to high  $R_f$  values (0.40 and 0.83) for the dye **5b**, although the  $R_f$  values for the dye **5a** carrying the  $\text{ClO}_4^-$  anion are zero under the same conditions.

# 1-Octylbenzo[cd]indol-2(1H)-one (2)

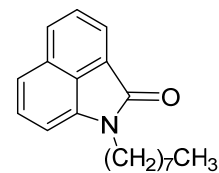

## <sup>1</sup>H NMR

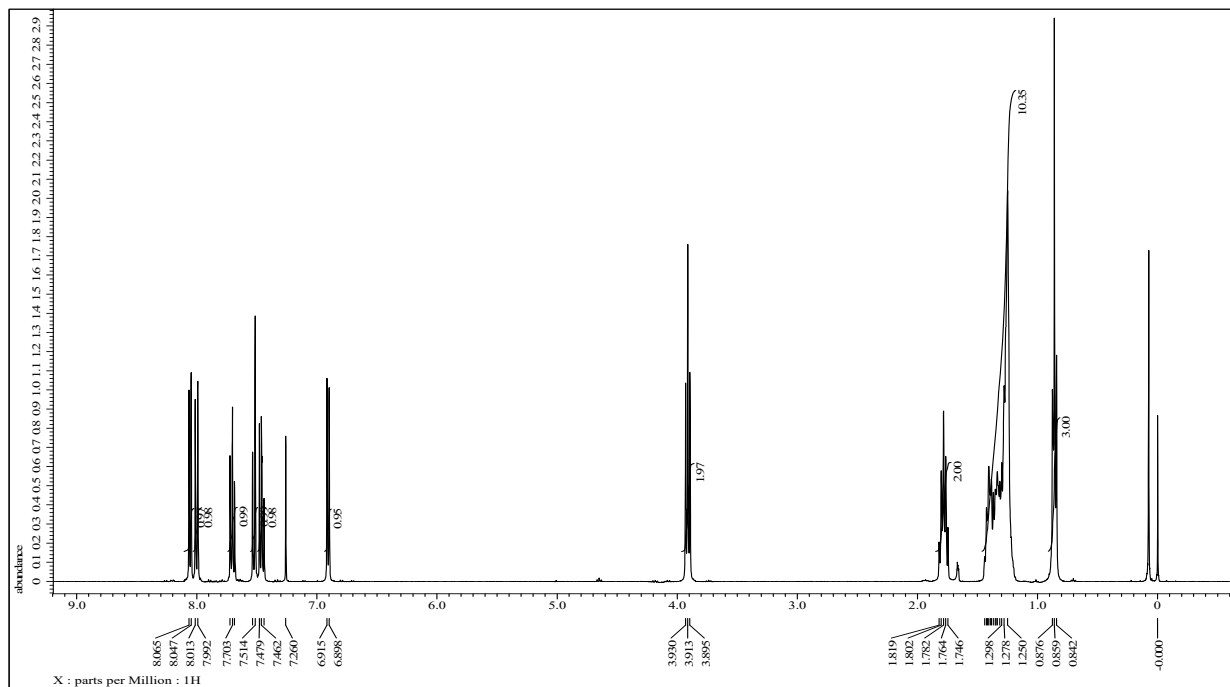

## <sup>13</sup>C NMR

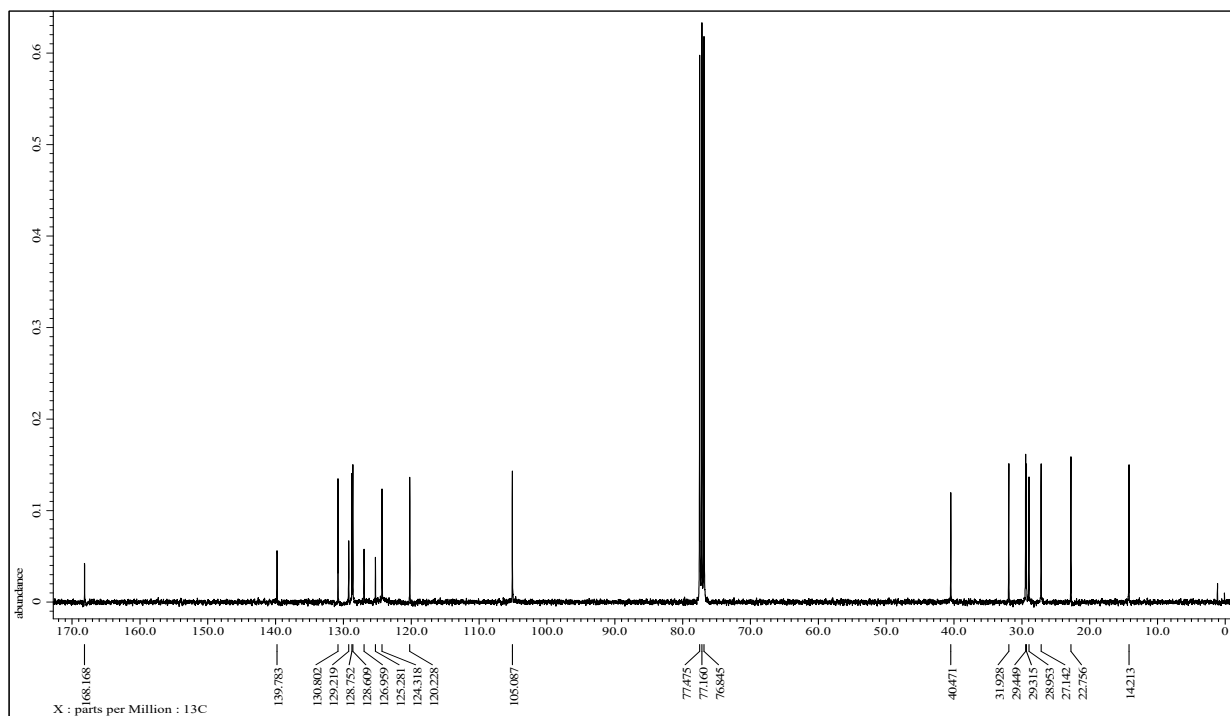

## 2-Methyl-1-octylbenzo[cd]indol-1-ium perchlorate (3)

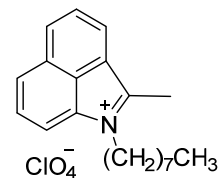

### $^1\text{H}$ NMR

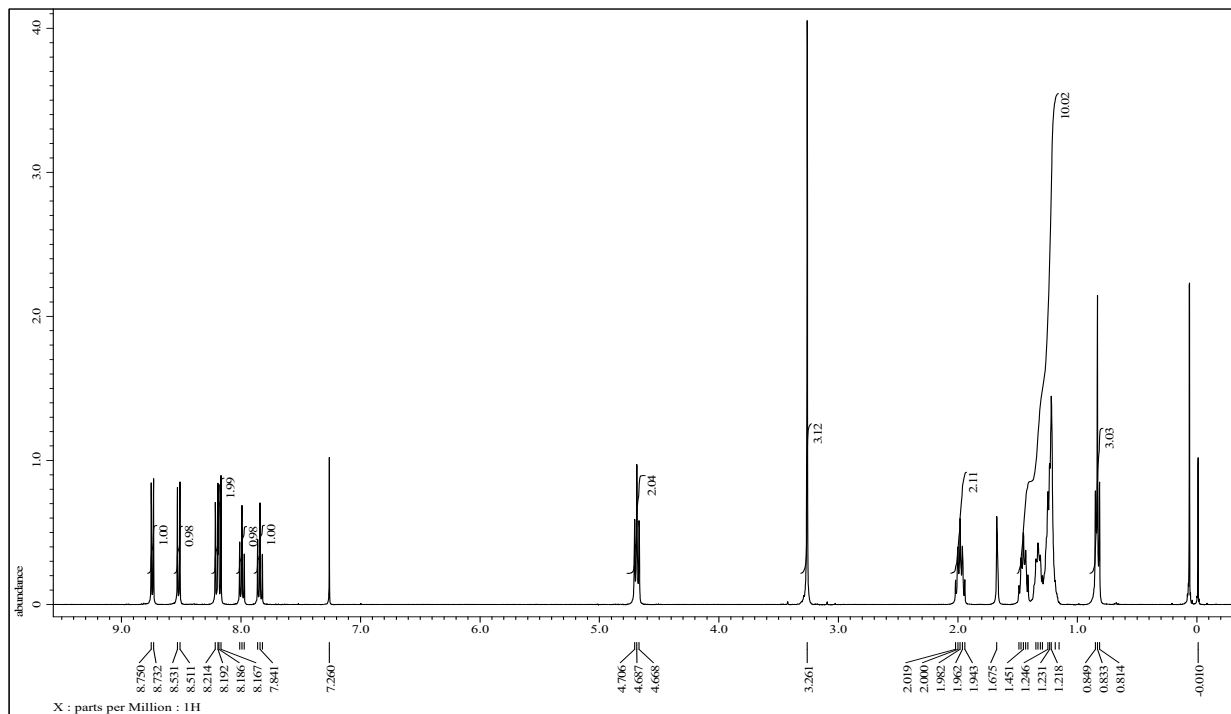

### $^{13}\text{C}$ NMR

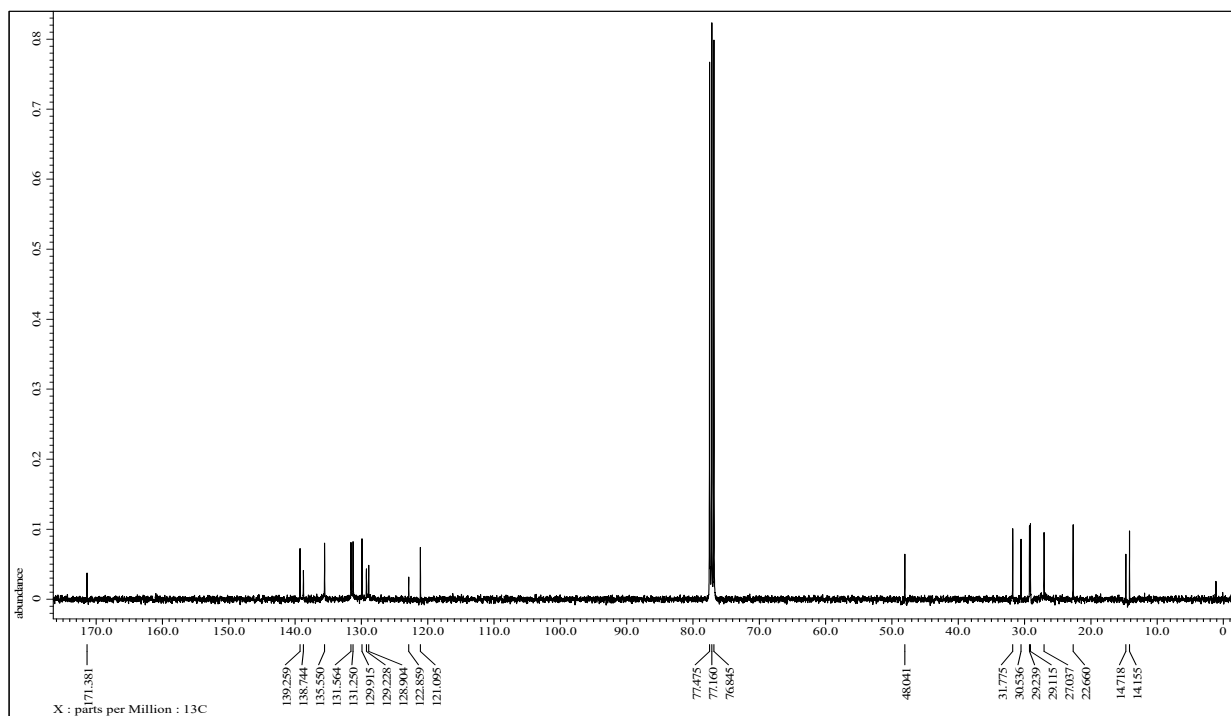

**2-((*E*)-2-((*E*)-2-Chloro-3-((*E*)-2-(1-octylbenzo[*cd*]indol-2(*1H*)-ylidene)ethylidene)cyclopent-1-en-1-yl)vinyl)-1-octylbenzo[*cd*]indol-1-ium perchlorate (5a)**

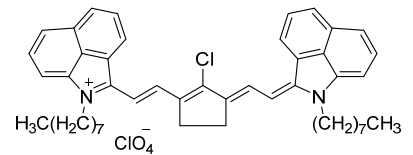

**$^1\text{H}$  NMR**

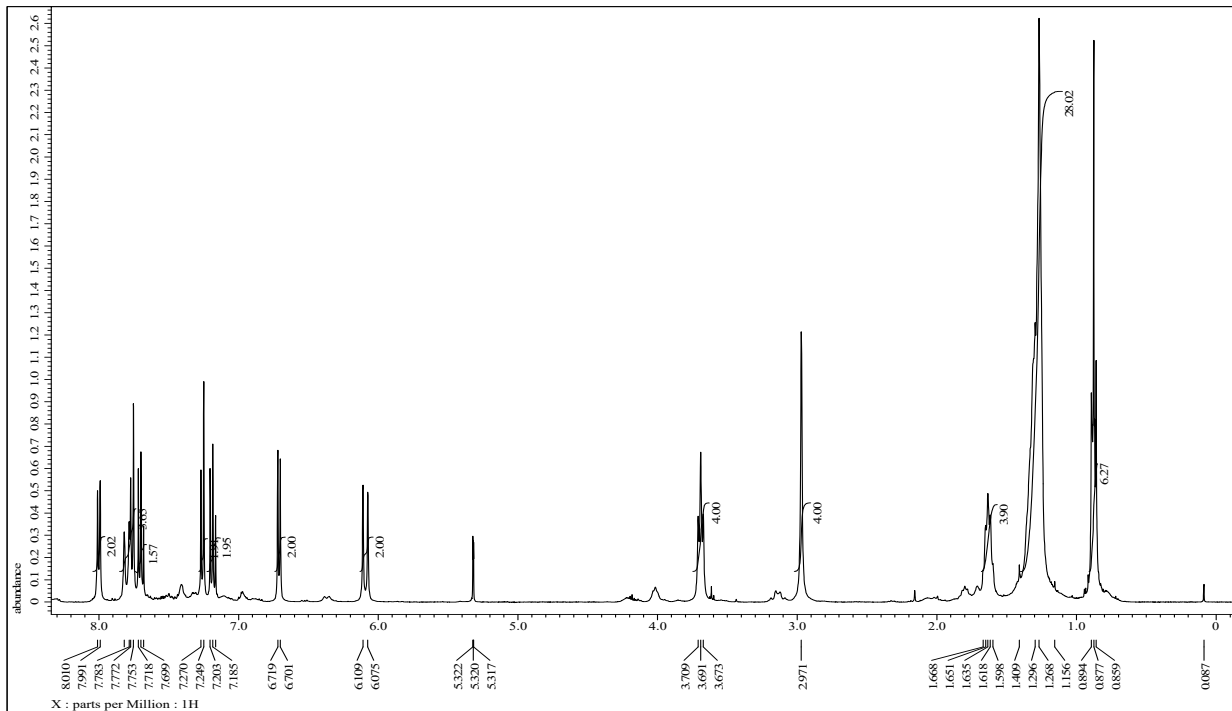

**$^{13}\text{C}$  NMR**

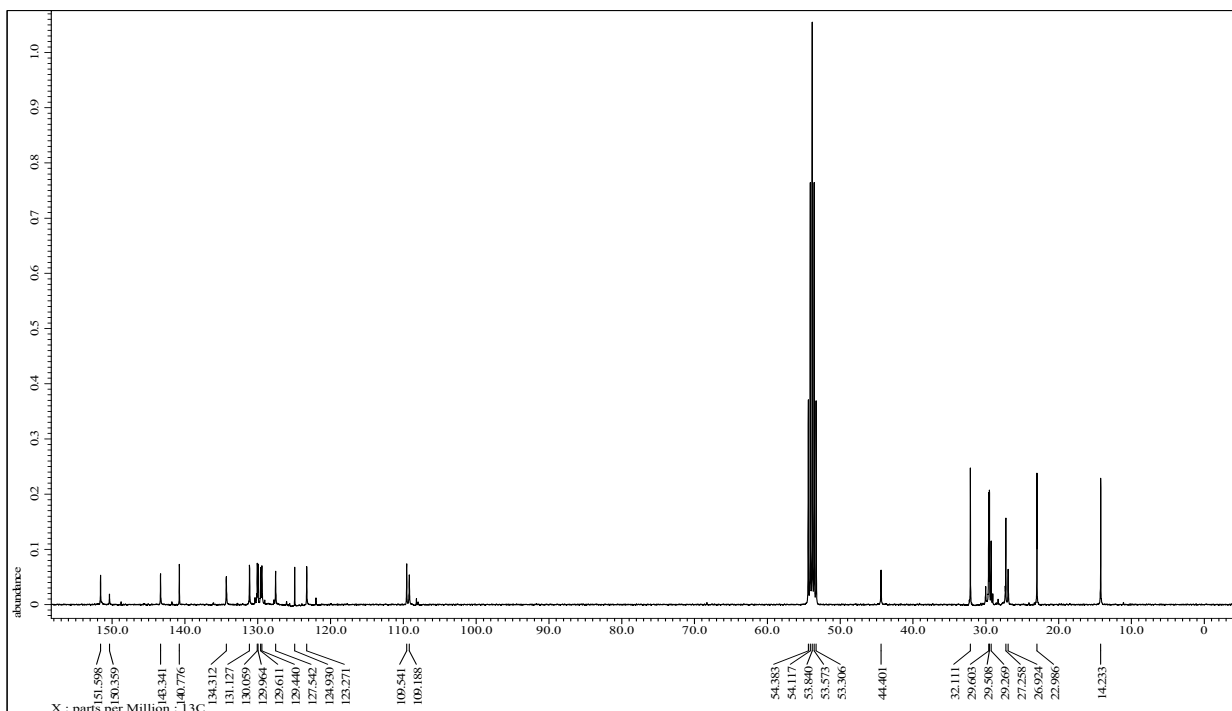

2-((*E*)-2-((*E*)-2-Chloro-3-((*E*)-2-(1-octylbenzo[*cd*]indol-2(*1H*)-ylidene)ethylidene)cyclopent-1-en-1-yl)vinyl)-1-octylbenzo[*cd*]indol-1-ium tetrakis(perfluorophenyl)borate (**5b**)

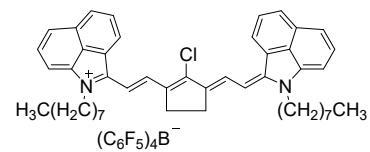

<sup>1</sup>H NMR

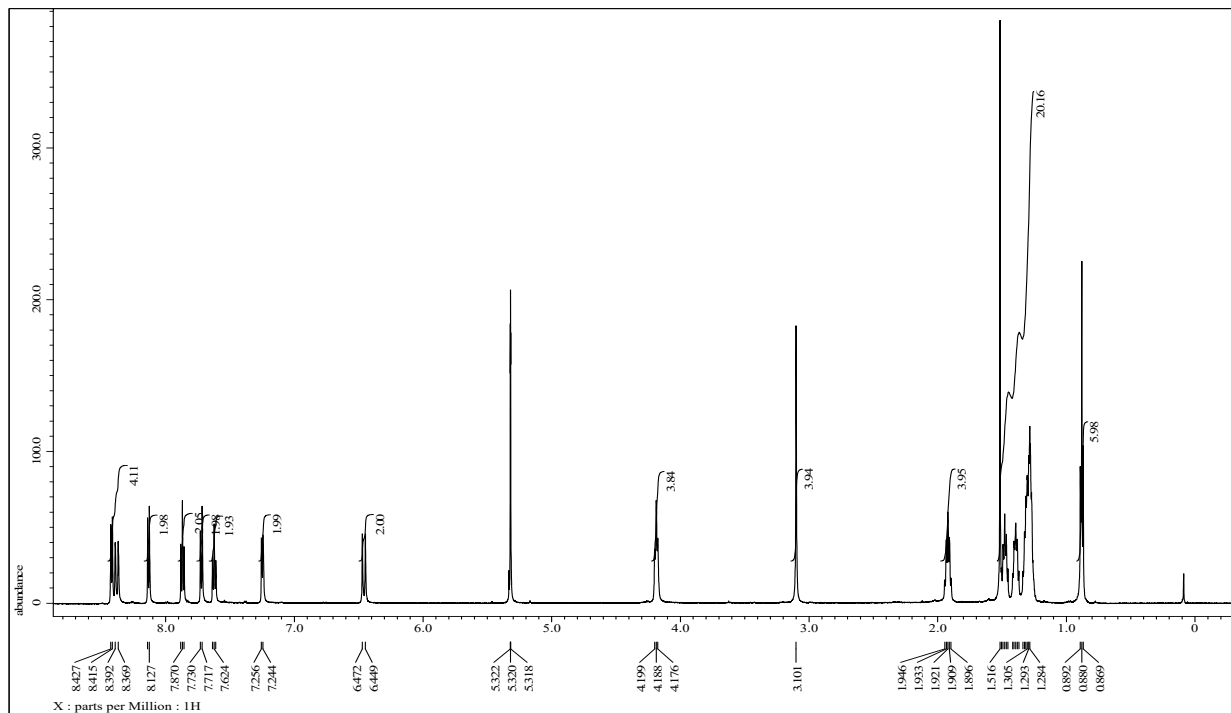

<sup>13</sup>C NMR

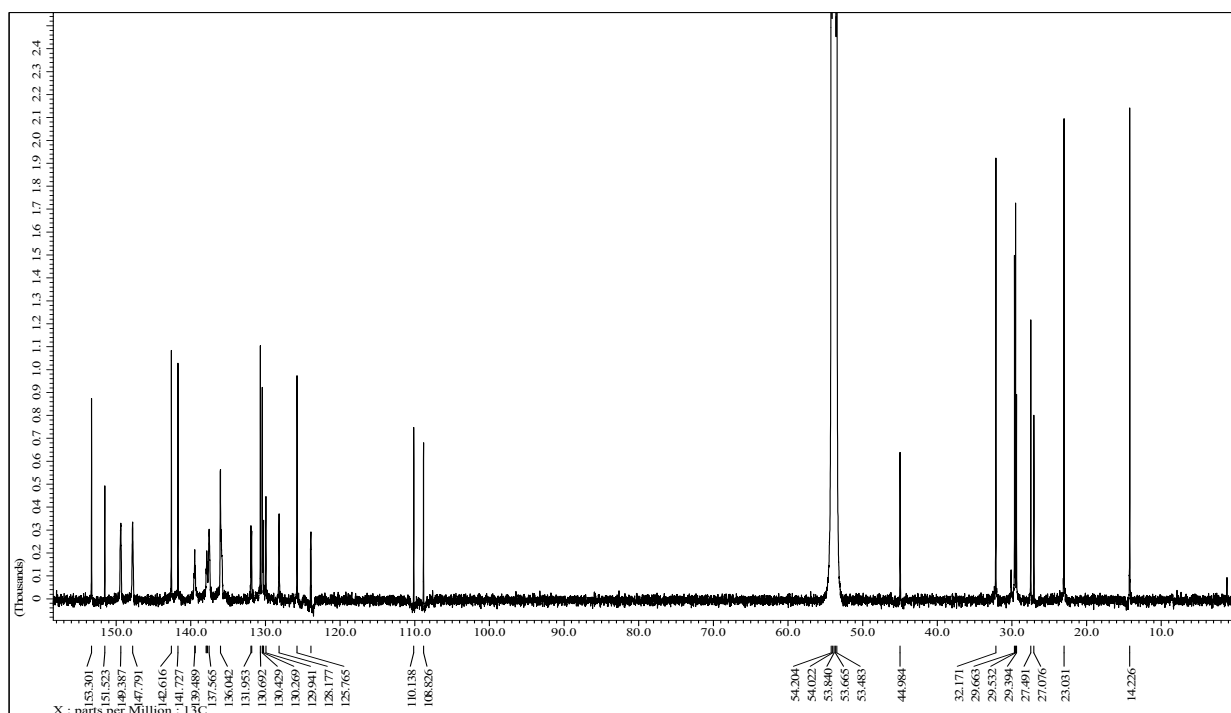

# <sup>19</sup>F NMR

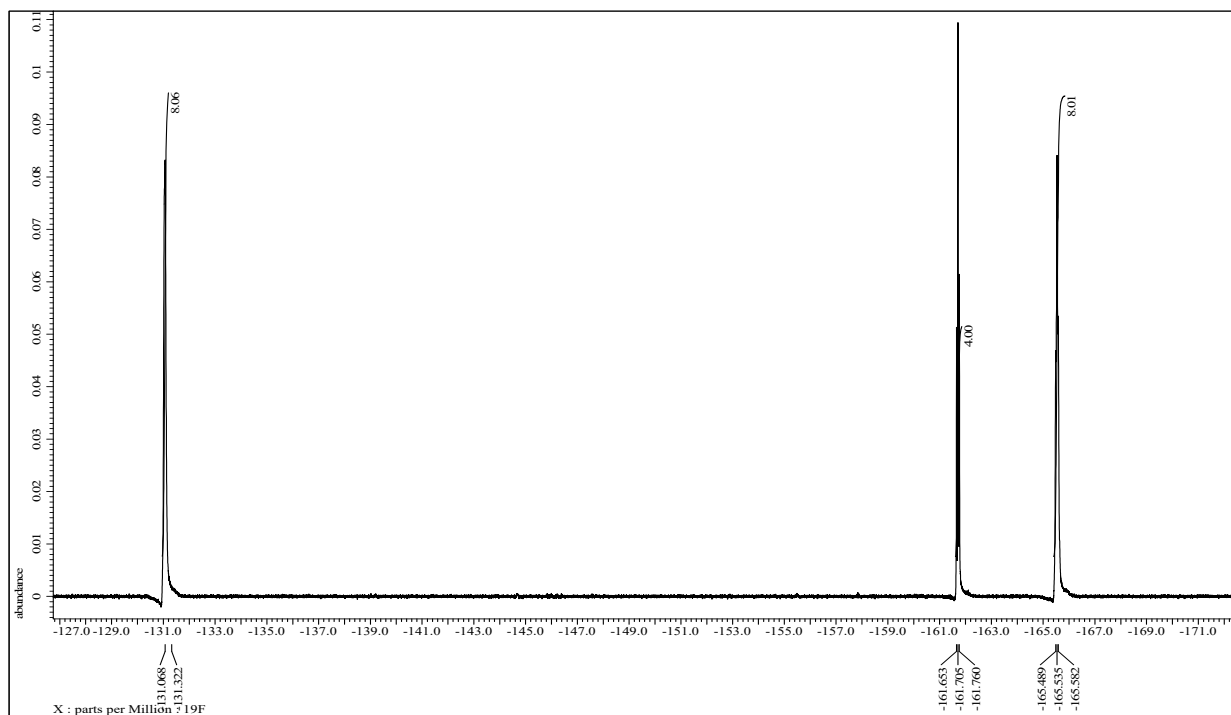

2-((*E*)-2-((*E*)-2-Chloro-3-((*E*)-2-(1-octylbenzo[*cd*]indol-2(*H*)-ylidene)ethylidene)cyclohex-1-en-1-yl)vinyl)-1-octylbenzo[*cd*]indol-1-ium tetrakis(perfluorophenyl)borate (6)

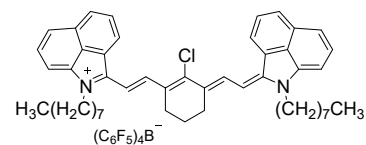

$^1\text{H}$  NMR

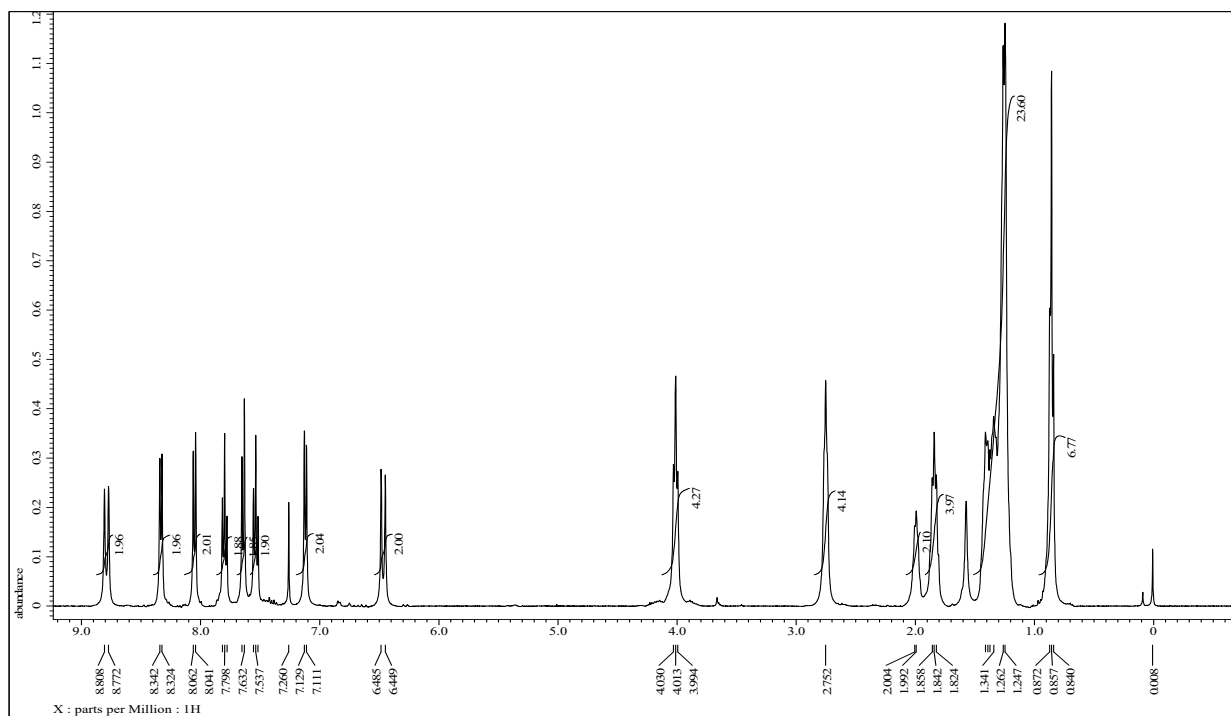

$^{13}\text{C}$  NMR

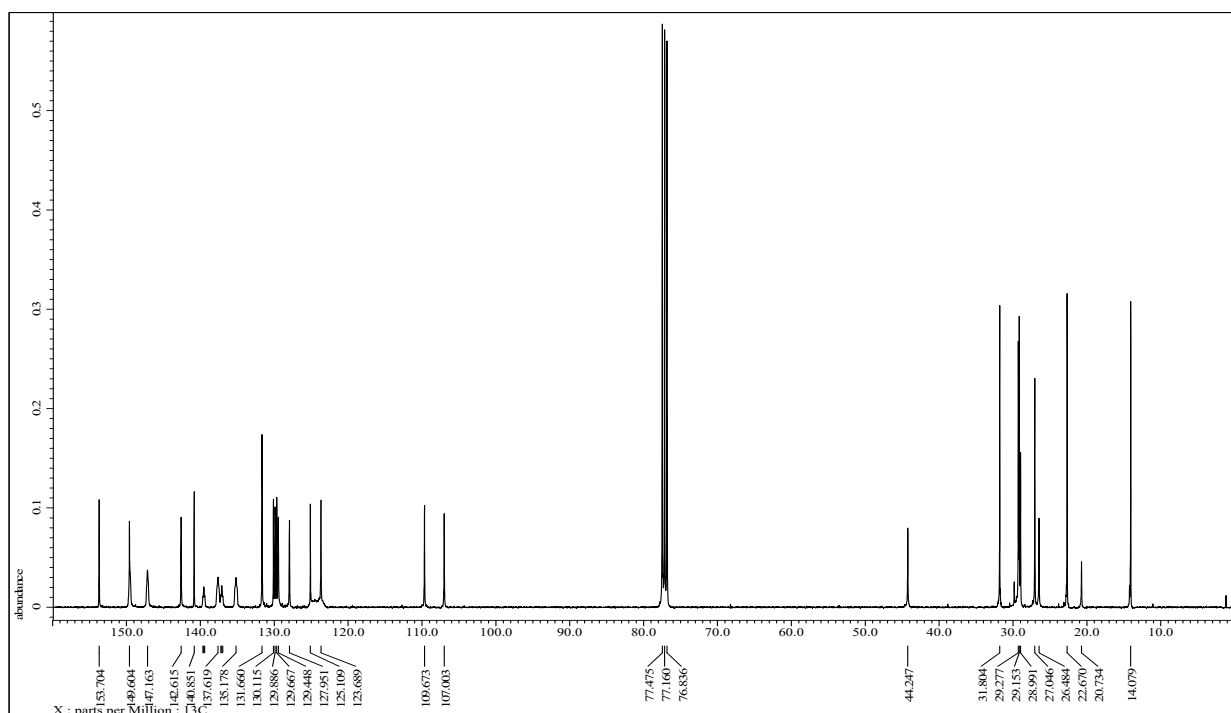



# <sup>19</sup>F NMR

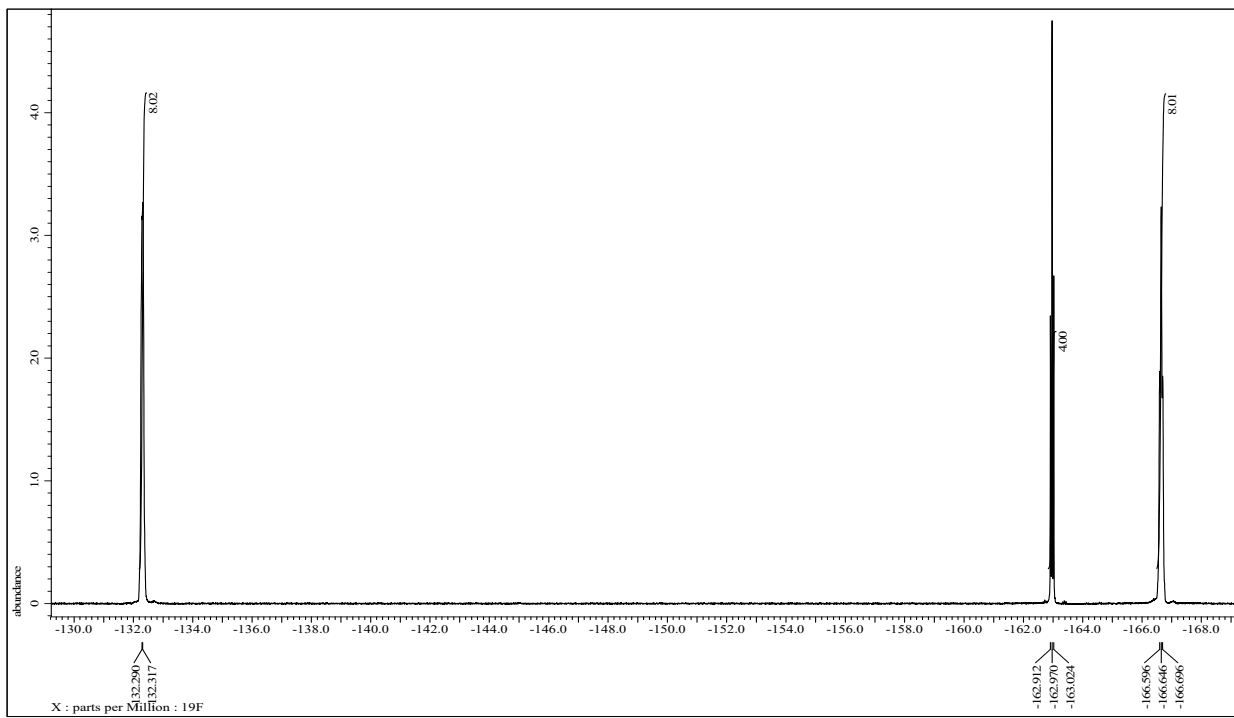

**1-Octyl-2-((E)-2-((E)-3-((E)-2-(1-octylbenzo[cd]indol-2(1H)-ylidene)ethylidene)-2-(p-tolyloxy)cyclopent-1-en-1-yl)vinyl)benzo[cd]indol-1-ium tetrakis(perfluorophenyl)borate (5c)**

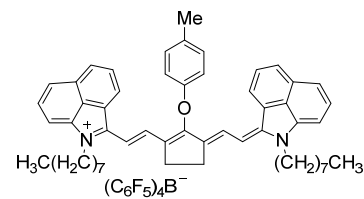

**$^1H$  NMR**

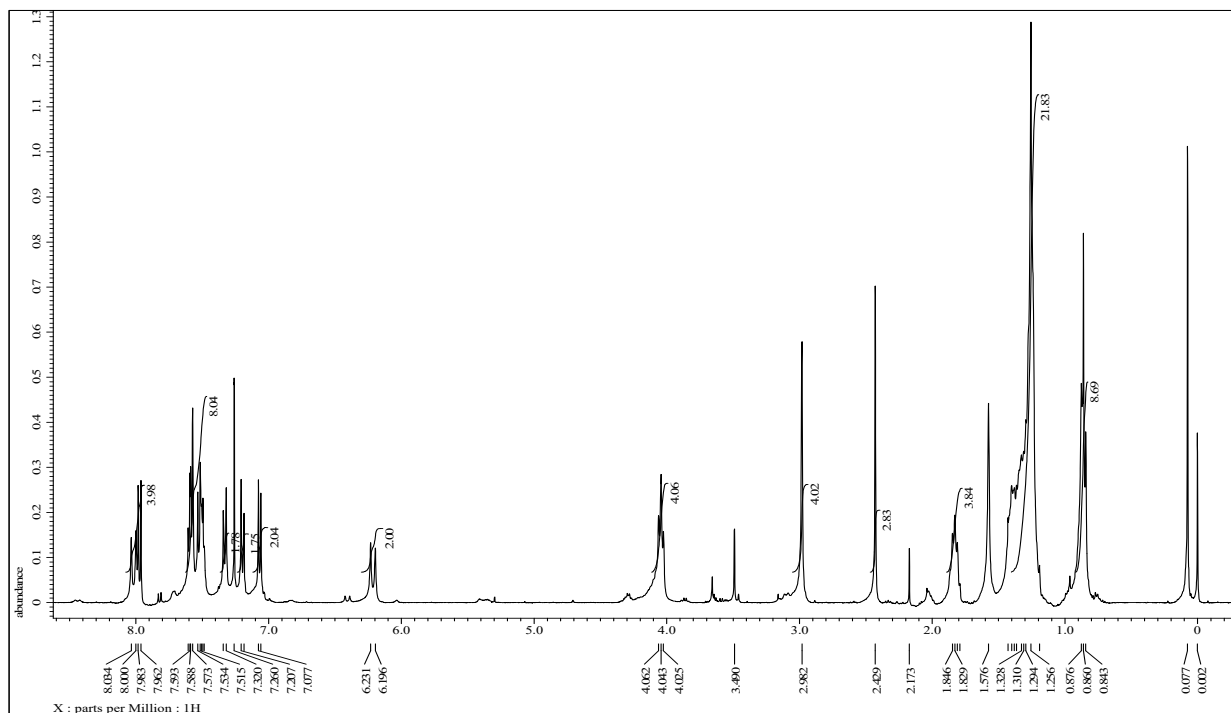

**$^{13}C$  NMR**

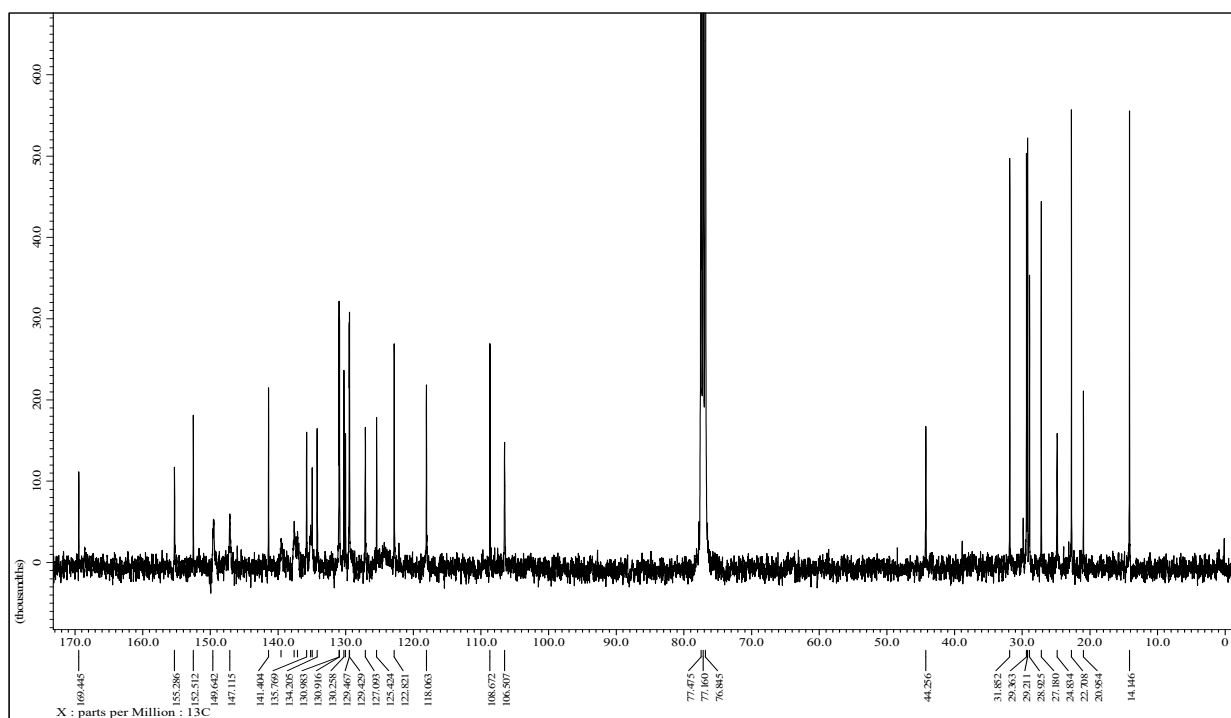

# <sup>19</sup>F NMR

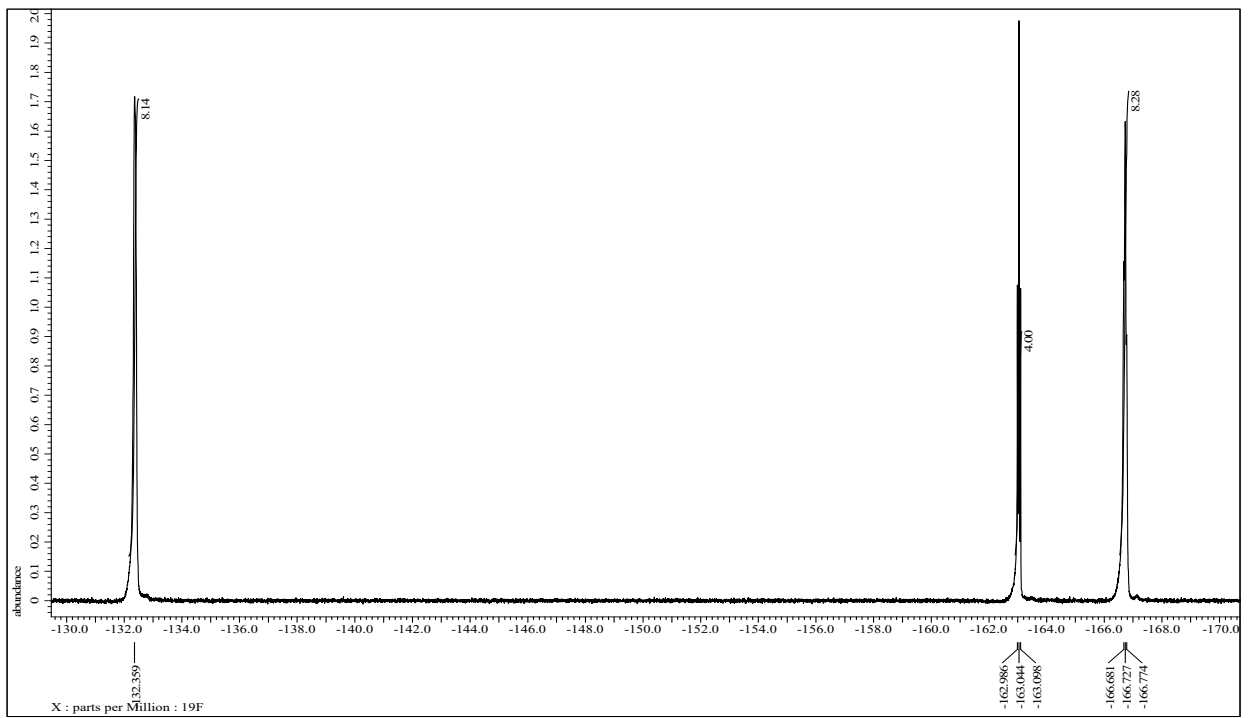

**1-Octyl-2-((E)-2-((E)-3-((E)-2-(1-octylbenzo[cd]indol-2(1H)-ylidene)ethylidene)-2-(p-tolylthio)cyclopent-1-en-1-yl)vinyl)benzo[cd]indol-1-ium tetrakis(perfluorophenyl)borate (5d)**

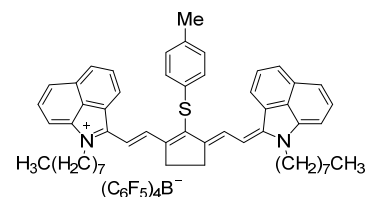

**<sup>1</sup>H NMR**

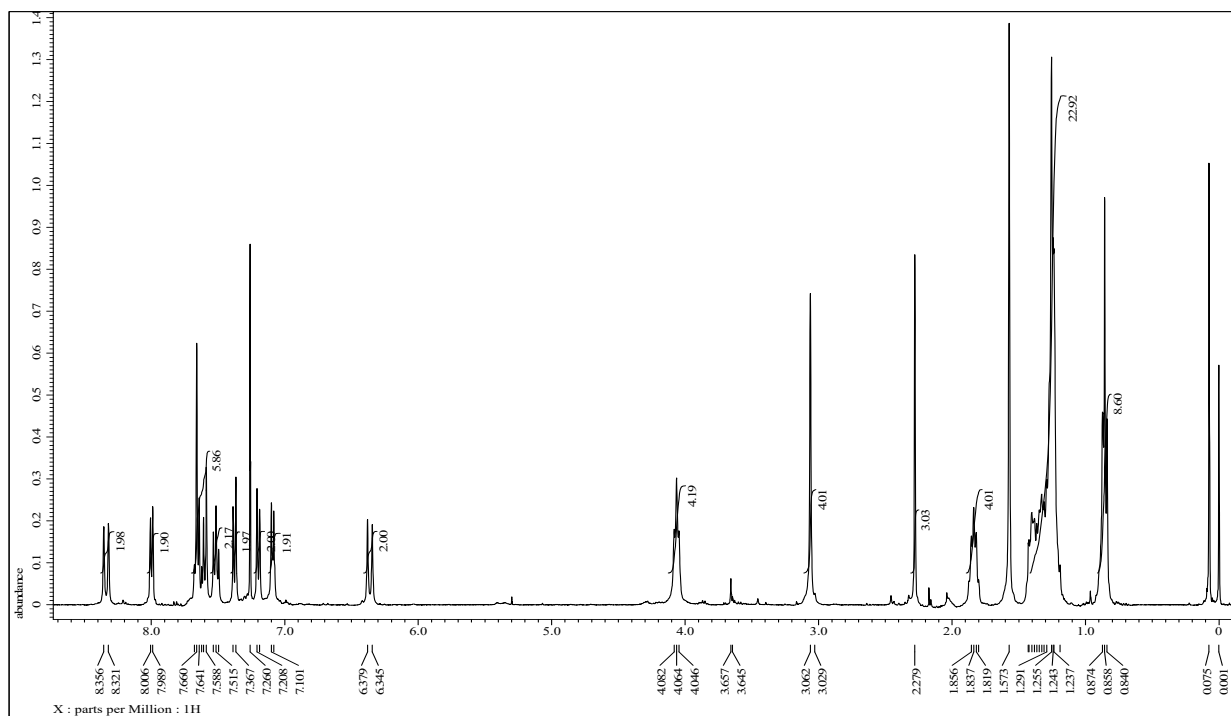

**<sup>13</sup>C NMR**

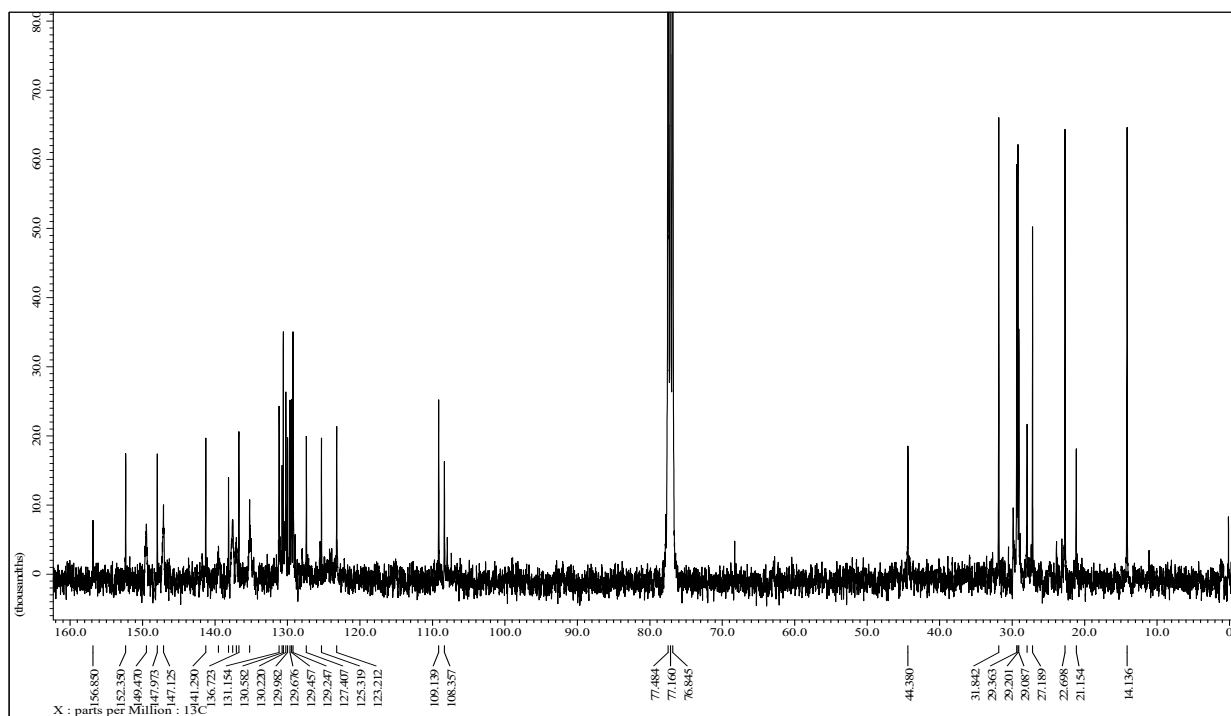

**<sup>19</sup>F NMR**

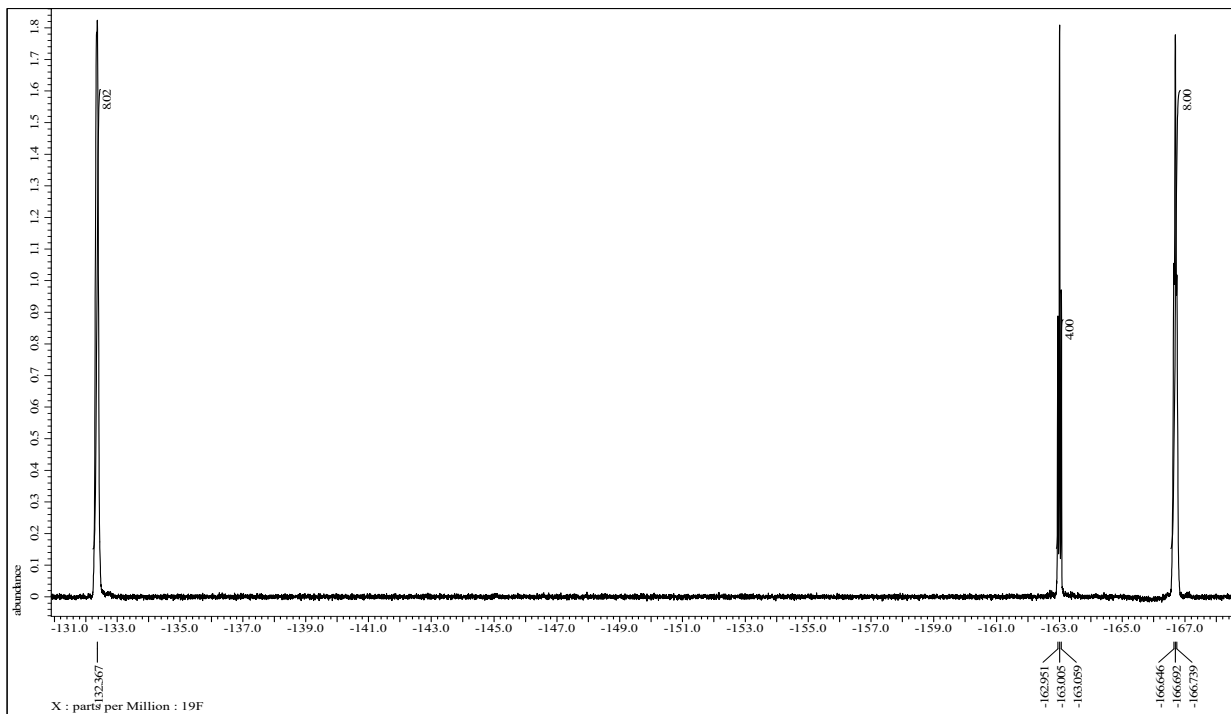

Supplement: c9nj00867e1.pdf [file c9nj00867e1.pdf]
